# Supplementary material for: Combining Novel Biomarkers for Risk Stratification of Two-Year Cardiovascular Mortality in Patients with ST-Elevation Myocardial Infarction
Source: MDPI journal article supplement (doi:10.3390/jcm9020550), 2020-02-18
Supplement: s1 [file s1]

Supplement Table 1. Gehan's Wilcoxon and log-rank analysis of risk factors for CVD in patients with STEMI during the follow-up period

| Variable                | $Z_V$ -statistics (basing on Gehan's Wilcoxon test) | $LR$ -statistics (basing on log-rank criteria) |
|-------------------------|-----------------------------------------------------|------------------------------------------------|
| LVEF < 60%              | $Z_V=2.308; (p=0.021)$                              | $LR=4.211; (p=0.040)$                          |
| NT-proBNP> 2141 pg/ml   | $Z_V =2.748; (p=0.006)$                             | $LR=8.807; (p=0.003)$                          |
| ST2 > 27.2 ng/ml        | $Z_V =2.967; (p=0.003)$                             | $LR=9.549; (p=0.002)$                          |
| Ptx-3 > 169 ng/ml       | $Z_V =2.807; (p=0.005)$                             | $LR=8.284; (p=0.004)$                          |
| Age > 65 years          | $Z_V =2.311; (p=0.021)$                             | $LR=4.451; (p=0.035)$                          |
| Gender                  | $Z_V =1.784; (p=0.074)$                             | $LR=3.781; (p=0.052)$                          |
| Troponin I > 1750 ng/ml | $Z_V =1.951; (p=0.051)$                             | $LR=3.812; (p=0.051)$                          |
